# Supplementary material for: Short-term supplementation of DHA as phospholipids rather than triglycerides improve cognitive deficits induced by maternal omega-3 PUFA deficiency during the late postnatal stage
Source: Royal Society of Chemistry journal article supplement (doi:10.1039/d0fo02552f), 2020-11-18
Supplement: d0fo02552f1.pdf [file d0fo02552f1.pdf]

**Table S1** Fatty acid composition of DHA-TG and DHA-PL

| Main fatty acids |        |        |
|------------------|--------|--------|
| (% of total FA)  | DHA-TG | DHA-PL |
| C14:0            | 4.09   | 2.28   |
| C16:0            | 0.56   | 28.11  |
| C16:1            | 5.67   | 0.57   |
| C18:0            | 0.37   | 8.44   |
| C18:1n-9         | 10.8   | 6.21   |
| C18:2n-6         | 0.65   | nd     |
| C18:3n-3         | 0.39   | 0.26   |
| C20:1n-9         | 0.82   | 10.6   |
| C20:4n-6 (AA)    | nd     | 2.09   |
| C20:5n-3 (EPA)   | 4.6    | 10.6   |
| C22:6n-3 (DHA)   | 39     | 32.8   |

Note: DHA-TG: Fish oil rich in DHA in the form of TGs. DHA-PL: squid (*S. oualaniensis*) roe extract rich in DHA in the form of PLs. "nd" means not detected.

**Table S2** Ingredient and fatty acid composition of the experimental diets

| Ingredient                   | O-3 Def | DHA-TG | DHA-PL |
|------------------------------|---------|--------|--------|
| Casein                       | 200     | 200    | 200    |
| Sucrose                      | 100     | 100    | 100    |
| Cornstarch                   | 150     | 150    | 150    |
| Maltose-dextrin              | 150     | 150    | 150    |
| dextrose                     | 199     | 199    | 199    |
| Cellulose                    | 50      | 50     | 50     |
| Mineral-salt mix             | 35      | 35     | 35     |
| Vitamin mix                  | 10      | 10     | 10     |
| L-methionine                 | 3       | 3      | 3      |
| Choline bitartrate           | 2.5     | 2.5    | 2.5    |
| TBHQ                         | 0.02    | 0.02   | 0.02   |
| Hydrogenated coconut oil     | 81      | 78.3   | 75.2   |
| Safflower oil                | 19      | 19     | 19     |
| DHA-TG                       | 0       | 2.7    | 0      |
| DHA-PL                       | 0       | 0      | 5.8    |
| Main fat acids Composition % |         |        |        |
| C18:2 n-6                    | 15.10   | 12.94  | 10.55  |

|           |      |      |      |
|-----------|------|------|------|
| C18:3 n-3 | 0.04 | 0.18 | 0.21 |
| C20:4 n-6 | nd   | nd   | nd   |
| C20:5 n-3 | nd   | 0.53 | 1.06 |
| C22:6 n-3 | nd   | 3.97 | 2.98 |

The experimental diets, an O-3 fatty acid deficient diet (O-3 Def), was based on the AIN-93 <sup>30</sup> formulation with several modifications to obtain the extremely low basal level of n-3 fatty acid required in this study. "nd" means not detected.

**Table S3** Effects of dietary supplement of DHA-TG and DHA-PL at 3 or 7-weeks of age on the major brain fatty acid composition.

| Fatty acids | O-3 Def | 3-week | 7-week |
|-------------|---------|--------|--------|
|-------------|---------|--------|--------|

|           |                        | DHA-TG                 | DHA-PL                 | DHA-TG                  | DHA-PL                  |
|-----------|------------------------|------------------------|------------------------|-------------------------|-------------------------|
| C14:0     | 0.89±0.12              | 0.67±0.13              | 0.61±0.16              | 0.78±0.13               | 0.60±0.14               |
| C16:0     | 22.41±0.64             | 20.87±1.10             | 23.17±0.85             | 20.67±0.91              | 22.37±0.70              |
| C18:0     | 17.65±0.32             | 16.78±0.29             | 16.15±0.37             | 17.68±0.29              | 16.68±0.35              |
| C16:1     | 0.85±0.11 <sup>a</sup> | 1.36±0.16 <sup>b</sup> | 1.41±0.14 <sup>b</sup> | 1.21±0.11 <sup>b</sup>  | 1.34±0.16 <sup>b</sup>  |
| C18:1 n-9 | 18.38±0.91             | 17.33±0.52             | 17.02±0.66             | 16.93±0.82              | 17.62±0.76              |
| C18:2 n-6 | 1.64±0.11 <sup>a</sup> | 1.24±0.31 <sup>b</sup> | 1.17±0.34 <sup>b</sup> | 1.44±0.35 <sup>b</sup>  | 1.05±0.46 <sup>b</sup>  |
| C18:3 n-3 | 0.41±0.21 <sup>a</sup> | 0.56±0.22 <sup>a</sup> | 0.76±0.18 <sup>b</sup> | 0.58±0.11 <sup>a</sup>  | 0.73±0.20 <sup>b</sup>  |
| C20:4 n-6 | 10.6±0.12 <sup>a</sup> | 9.80±0.42 <sup>b</sup> | 8.70±0.31 <sup>c</sup> | 9.80±0.35 <sup>d</sup>  | 9.0±0.34 <sup>b</sup>   |
| C20:5 n-3 | nd                     | nd                     | nd                     | nd                      | nd                      |
| C22:5 n-6 | 3.60±0.23 <sup>a</sup> | 1.86±0.15 <sup>b</sup> | 1.63±0.22 <sup>b</sup> | 2.31±0.19 <sup>c</sup>  | 1.81±0.24 <sup>b</sup>  |
| C22:6 n-3 | 9.15±0.12 <sup>a</sup> | 15.1±0.36 <sup>b</sup> | 16.81±1.6 <sup>c</sup> | 13.42±0.69 <sup>d</sup> | 15.73±1.71 <sup>c</sup> |

Values are presented as the mean ± SEM (n=8).  $p < 0.05$  was considered to indicate statistically significant. Different letter indicates significantly difference between each group. Some minor and unidentified peaks were not listed, "nd" means not detected.
